# Supplementary material
Source: Springer Nature journal article supplement (https://www.springermedizin.de/resource/supplementary/12889_2008_1660_MOESM3_ESM.pdf/9503668)

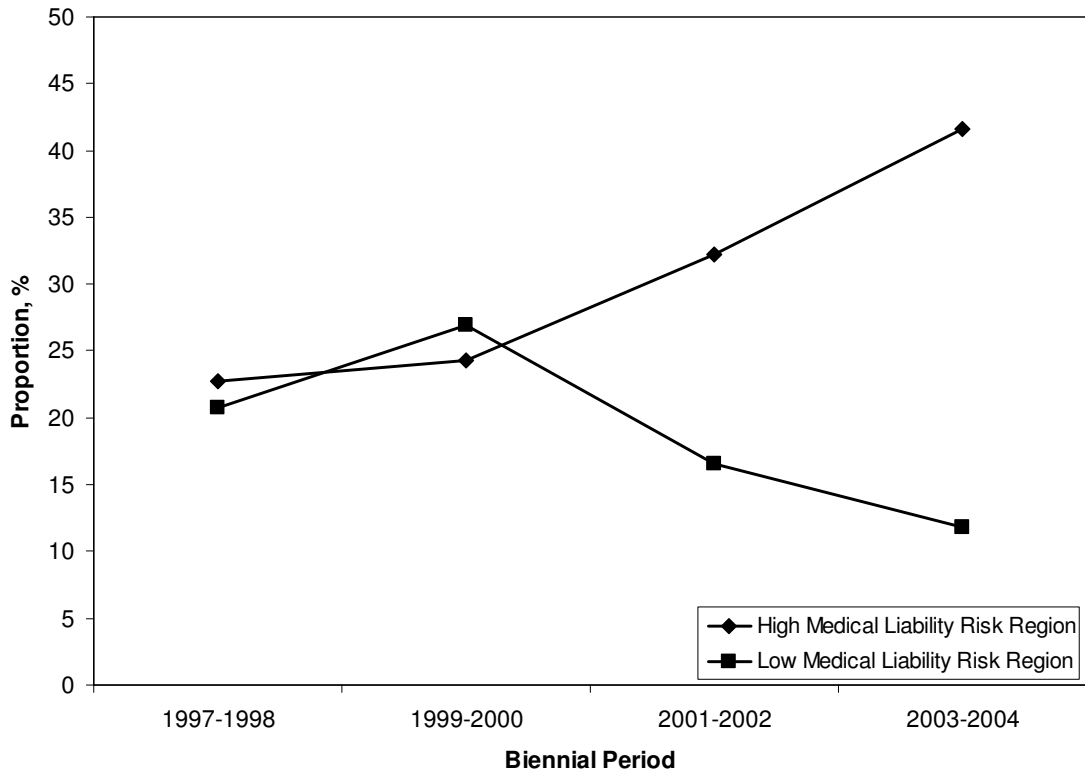

No. of Visits  
(thousands)

8860

8760

7350

9390

Supplement: MOESM3 [file 9503668]
